# Supplementary material for: Measurement-based modelling of bromine-induced oxidation of mercury above the Dead Sea
Source: Copernicus journal article supplement (doi:10.5194/acp-12-2429-2012), 2012-03-05
Supplement: Supplementary file 1 [file acp-12-2429-2012-supplement.pdf]

## Supplementary Information

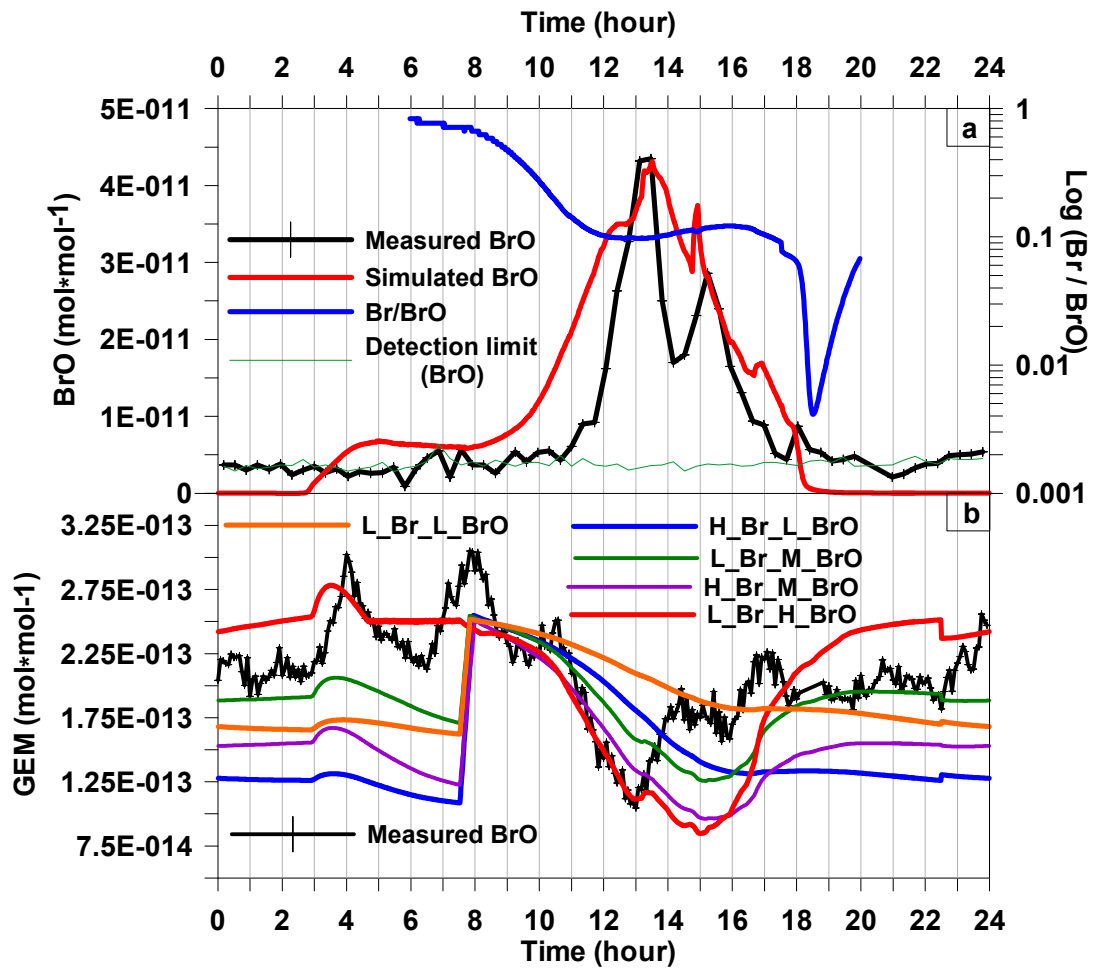

Supplementary Figure 1. Simulated vs. measured diurnal profiles of GEM and BrO. (a) Measured and simulated diurnal profiles of BrO as well as simulated diurnal profile of  $[\text{Br}]/[\text{BrO}]$  for Julian day 197. (b) Different combinations of values for  $k_{\text{Hg}+\text{BrO}}$  and  $k_{\text{Hg}+\text{Br}}$  were used to evaluate the simulated GEM diurnal profiles (Sect. 2.3).

| Reaction | $k$ [ $\text{cm}^3 \text{molecule}^{-1} \text{s}^{-1}$ ] or $\text{s}^{-1}$    | Reference                                              |
|----------|--------------------------------------------------------------------------------|--------------------------------------------------------|
| G1       | $\text{Hg} + \text{O}_3 \rightarrow \text{HgO} + \text{O}_2$                   | $8.43E - 17 \times \exp(-1407K/T)$ A                   |
| G2       | $\text{Hg} + \text{OH} \rightarrow \text{HgO} + \text{H}$                      | $3.55E - 14 \times \exp(294K/T)$ A                     |
| G3       | $\text{Hg} + \text{NO}_3 \rightarrow \text{HgO} + \text{NO}_2$                 | $4.0E - 15$ B                                          |
| G4       | $\text{Hg} + \text{Br} \rightarrow \text{HgBr}$                                | $2.7E - 13$ C                                          |
| G5       | $\text{HgBr} \rightarrow \text{Hg} + \text{Br}$                                | $1.2 \times E10 \times \exp(-8357/T) \text{ s}^{-1}$ D |
| G6       | $\text{HgBr} + \text{BrO} \rightarrow \text{BrHgOBr}$                          | $3.0E - 12$ E                                          |
| G7       | $\text{Hg} + \text{BrO} \rightarrow \text{HgO} + \text{Br}$                    | $1.5E - 13$ F                                          |
| G8       | $\text{Hg} + \text{H}_2\text{O}_2 \rightarrow \text{HgO} + \text{H}_2\text{O}$ | $8.5E - 19$ G                                          |
| G9       | $\text{Hg} + \text{H}_2\text{O}_2 \rightarrow \text{Hg}(\text{OH})_2$          | $6.1E - 19$ H                                          |
| G10      | $\text{Hg} + \text{Br}_2 \rightarrow \text{HgBr}_2$                            | $9.0E - 17$ I                                          |
| G11      | $\text{HgBr} \rightarrow \text{Hg} + \text{Br}$                                | $6.09E - 4$ F                                          |
| G23      | $\text{HgBr} + \text{Br} \rightarrow \text{HgBr}_2$                            | $3.0E - 12$ J                                          |
| G13      | $\text{HgBr} + \text{Cl} \rightarrow \text{ClHgBr}$                            | $3.0E - 12$ *                                          |
| G14      | $\text{HgCl} + \text{Br} \rightarrow \text{ClHgBr}$                            | $3.0E - 12$ *                                          |
| G15      | $\text{Hg} + \text{HCl} \rightarrow \text{HgCl}_2$                             | $1.0E - 19$ K                                          |
| G16      | $\text{Hg} + \text{Cl} \rightarrow \text{HgCl}$                                | $1.0E - 11$ I                                          |
| G17      | $\text{Hg} + \text{Cl}_2 \rightarrow \text{HgCl}_2$                            | $2.6E - 18$ I                                          |
| G18      | $\text{Hg} + \text{ClO} \rightarrow \text{HgOCl}$                              | $1.9E - 14$ L                                          |
| G19      | $\text{Hg} + \text{I}_2 \rightarrow \text{HgI}_2$                              | $1.27E - 19$ M                                         |
| G20      | $\text{Hg} + \text{I} \rightarrow \text{HgI}$                                  | $4.0E - 13 \times (T / 298K)^{-2.38}$ D                |

Supplementary Table 1. Gas phase reactions. A. Pal and Ariya (2004); B. Sommar et al. (1997); C. Donohoue et al. (2006); D. Goodsite et al. (2004); E. Shon et al. (2005); F. Raofie and Ariya (2003); G. Tokos et al. (1998); H. Xie et al. (2008); I. Ariya et al. (2002); J. Hedgecock et al. (2005); J. Calvert and Lindberg (2003). K. Hall and Bloom (1993). L. Byun et al. (2010); M. Raofie et al. (2008).

\* Since the kinetics of these reactions have is not known, we have used the value  $k(\text{HgBr} + \text{Br})$  as assumed by Calvert and Lindberg (2003)(see Xie et al., 2008).

| Reaction No. |                                              | $K (M^{-1}s^{-1}) / s^{-1}$ | Reference |
|--------------|----------------------------------------------|-----------------------------|-----------|
| A1           | $Hg+O_3 \rightarrow HgO+O_2$                 | $4.7E7$                     | A         |
| A2           | $HgO+H^+ \rightarrow Hg^{2+}+OH^-$           | $1.0E10$                    | B         |
| A3           | $Hg+OH \rightarrow Hg^++OH^-$                | $2.0E9$                     | C         |
| A4           | $Hg^++OH \rightarrow Hg^{++}+OH^-$           | $1.0E10$                    | C         |
| A5           | $Hg^{2+}+HO_2 \rightarrow Hg^++O_2+H^+$      | $1.1E4$                     | D         |
| A6           | $Hg^++HO_2 \rightarrow Hg+O_2+H^+$           | $1.0E10$                    | E         |
| A7           | $Hg+HOCl \rightarrow Hg^{2+}+Cl^-+OH^-$      | $2.09E6$                    | F         |
| A8           | $Hg+ClO^-+H^+ \rightarrow Hg^{2+}+Cl^-+OH^-$ | $1.99E6$                    | F         |
| A9           | $Hg+HOBr^- \rightarrow Hg^{2+}+Br^-+OH^-$    | $0.279$                     | G         |
| A10          | $Hg^{++}+O_2^- \rightarrow Hg^++O_2$         | $1.1E4$                     | D         |
| A11          | $Hg+Br_2 \rightarrow Hg^{2+}+2Br^-$          | $0.196$                     | G         |
| A12          | $HgSO_3+H_2O \rightarrow Hg+HSO_4^-+H^+$     | $0.0106$                    | H         |
| A13          | $Hg(OH)_2 \xrightarrow{h\nu} Hg+2 OH$        | $3E-7 s^{-1}$               | I         |

Supplementary Table 2. Aqueous phase reactions. A. Munthe (1992); B. Pleijel and Munthe (1995); C. Lin and Pehkonen (1997); D. Pehkonen and Lin (1997); E. Xie et al. (2008); F. Lin and Pehkonen (1999); G. Wang and Pehkonen (2004); H. van Loon et al. (2000); I. Xiao et al. (1994).

| Reaction |                                                                                                     | K [M <sup>-1</sup> ] | Reference |
|----------|-----------------------------------------------------------------------------------------------------|----------------------|-----------|
| EQ1      | Hg(II)+OH <sup>-</sup> ↔ Hg(OH) <sup>+</sup>                                                        | 3.9E10               | A         |
| EQ2      | Hg(OH) <sup>+</sup> +OH <sup>-</sup> ↔ Hg(OH) <sub>2</sub>                                          | 1.6E11               | A         |
| EQ3      | Hg <sup>2+</sup> +SO <sub>3</sub> <sup>2-</sup> ↔ HgSO <sub>3</sub>                                 | 2.1E13               | B         |
| EQ4      | HgSO <sub>3</sub> + SO <sub>3</sub> <sup>2-</sup> ↔ Hg(SO <sub>3</sub> ) <sub>2</sub> <sup>2-</sup> | 1.0E10               | B         |
| EQ5      | Hg(OH) <sup>+</sup> +Cl <sup>-</sup> ↔ HgOHCl                                                       | 2.7E7                | A         |
| EQ6      | Hg(II)+Cl <sup>-</sup> ↔ HgCl <sup>+</sup>                                                          | 2.0E7                | C         |
| EQ7      | HgCl <sup>+</sup> +Cl <sup>-</sup> ↔ HgCl <sub>2</sub>                                              | 2.5E6                | A         |
| EQ8      | HgCl <sub>2</sub> +Cl <sup>-</sup> ↔ HgCl <sub>3</sub> <sup>-</sup>                                 | 6.7E0                | D         |
| EQ9      | HgCl <sub>3</sub> <sup>-</sup> +Cl <sup>-</sup> ↔ HgCl <sub>4</sub> <sup>2-</sup>                   | 1.3E1                | D         |
| EQ10     | Hg(II)+Br <sup>-</sup> ↔ HgBr <sup>+</sup>                                                          | 1.1E9                | D         |
| EQ11     | HgBr <sup>+</sup> + Br <sup>-</sup> ↔ HgBr <sub>2</sub>                                             | 2.5E8                | D         |
| EQ12     | HgBr <sub>2</sub> +Br <sup>-</sup> ↔ HgBr <sub>3</sub> <sup>-</sup>                                 | 1.5E2                | D         |
| EQ13     | HgBr <sub>3</sub> <sup>-</sup> +Br <sup>-</sup> ↔ HgBr <sub>4</sub> <sup>2-</sup>                   | 2.3E1                | D         |

Supplementary Table 3. Aqueous-phase equilibria. A. Pleijel and Munthe (1995); B. van Loon et al. (2001); C. Smith and Martell (1976); D. Clever et al. (1985).

| Reference |                                                                               | $K_H$ [M/atm] | Reference |
|-----------|-------------------------------------------------------------------------------|---------------|-----------|
| H1        | $\text{Hg} \rightarrow \text{Hg}_{(\text{aq})}$                               | $3.2E-1$      | A         |
| H2        | $\text{HgO}_{(\text{g})} \rightarrow \text{HgO}_{(\text{aq})}$                | $2.69E12$     | B         |
| H3        | $\text{HgCl}_2 \rightarrow \text{HgCl}_{2(\text{aq})}$                        | $2.75E6$      | C         |
| H4        | $\text{HgBr}_2 \rightarrow \text{HgBr}_{2(\text{aq})}$                        | $2.75E6$      | D         |
| H5        | $\text{Hg}(\text{OH})_2 \rightarrow \text{Hg}(\text{OH})_{2(\text{aq})}$      | $1.2E4$       | E         |
| H6        | $(\text{CH}_3)_2\text{Hg} \rightarrow (\text{CH}_3)_2\text{Hg}_{(\text{aq})}$ | $1.3E-1$      | E         |
| H7        | $\text{CH}_3\text{HgCl} \rightarrow \text{CH}_3\text{HgCl}_{(\text{aq})}$     | $2.2E3$       | E         |
| H8        | $\text{CH}_3\text{HgOH} \rightarrow \text{CH}_3\text{HgOH}_{(\text{aq})}$     | $1.5E5$       | F         |
| H9        | $\text{BrHgOBr} \rightarrow \text{BrHgOBr}_{(\text{aq})}$                     | $2.75E6$      | G         |

Supplementary Table 4. Heterogeneous Reactions. A. Schroeder et al. (1991); B. Schroeder and Munthe (1998); C. Hedgecock et al. (2005); D. Hedgecock and Pirrone. (2004); E. Seigneur (1994); F. Petersen (1998). G.  $K_H$  assumed to be as  $\text{HgCl}_2$  (Xie et al., 2008).
